# Supplementary material for: Up-regulated and interrelated expressions of GINS subunits predict poor prognosis in hepatocellular carcinoma
Source: PubMed Central journal article supplement (PMC6435550; doi:10.1042/bsr20181178), 2018-12-07
Supplement: bsr20181178_Supp1.pdf [file bsr20181178_Supp1.pdf]

Supplementary Table 1. Summary of the associations between of GINS subunit expression with OS by histological grade in male HCC patients

| GINS Subunits | Grade of Male HCC Patients | HR   | 95% CI     | <i>P</i> Value |
|---------------|----------------------------|------|------------|----------------|
| GINS1         | I                          | 1.28 | 0.56-2.92  | 0.56           |
|               | II                         | 4.67 | 1.47-14.79 | 0.0043*        |
|               | III                        | 1.90 | 0.90-4.01  | 0.087          |
| GINS2         | I                          | 0.99 | 0.43-2.24  | 0.97           |
|               | II                         | 2.49 | 0.89-6.96  | 0.074          |
|               | III                        | 1.47 | 0.69-3.12  | 0.31           |
| GINS3         | I                          | 1.67 | 0.72-3.86  | 0.23           |
|               | II                         | 3.41 | 1.16-10.01 | 0.019*         |
|               | III                        | 1.89 | 0.88-4.05  | 0.095          |
| GINS4         | I                          | 0.94 | 0.41-2.12  | 0.87           |
|               | II                         | 1.88 | 0.68-5.19  | 0.21           |
|               | III                        | 1.52 | 0.72-3.20  | 0.27           |

\**P*<0.05
